# Supplementary material
Source: PubMed Central journal article supplement (PMC9634858)
Supplement: NEJMc2211055_disclosures.pdf [file NEJMc2211055_disclosures.pdf]

**Disclosure Purpose:** 22-11055

### Summary of Interests

I do not have any interests to disclose at this time.

### Additional Questions:

- Are there other relationships or activities that readers could perceive to have influenced, or that give the appearance of potentially influencing, what you wrote in the submitted work?**  
No.
- What is the manuscript title?**  
Immune Imprinting and Protection against Repeat Reinfection with SARS-CoV-2
- Are you the corresponding author?**  
No.

### Certification

I certify that the information provided in this disclosure is complete and accurate.

**Disclosure Purpose:** 22-11055

### Summary of Interests

I do not have any interests to disclose at this time.

### Additional Questions:

1. **Are there other relationships or activities that readers could perceive to have influenced, or that give the appearance of potentially influencing, what you wrote in the submitted work?**No.

2. **What is the manuscript title?**

Immune Imprinting and Protection against Repeat Reinfection with SARS-CoV-2

3. **Are you the corresponding author?**

Yes.

a. **Please list the other authors' names here.**

Hiam Chemaitelly Houssein H. Ayoub Patrick Tang Mohammad R. Hasan Peter Coyle Hadi M. Yassine Hebah A. Al-Khatib Maria K Smatti Zaina Al-Kanaani Einas Al-Kuwari Andrew Jeremijenko Anvar Hassan Kaleeckal Ali Nizar Latif Riyazuddin Mohammad Shaik Hanan F. Abdul-Rahim Gheyath K. Nasrallah Mohamed Ghaith Al-Kuwari Adeel A. Butt Hamad Eid Al-Romaihi Mohamed H. Al-Thani Abdullatif Al-Khal Roberto Bertollini

### Certification

I certify that the information provided in this disclosure is complete and accurate.

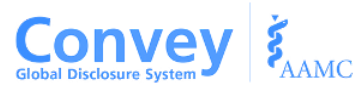

**Disclosure Purpose:** 22-11055

**Summary of Interests**

I do not have any interests to disclose at this time.

**Additional Questions:**

- 1. **Are there other relationships or activities that readers could perceive to have influenced, or that give the appearance of potentially influencing, what you wrote in the submitted work?**  
No.
- 2. **What is the manuscript title?**  
Immune Imprinting and Protection against Repeat Reinfection with SARS-CoV-2
- 3. **Are you the corresponding author?**  
No.

**Certification**

I certify that the information provided in this disclosure is complete and accurate.

**Disclosure Purpose:** 22-11055

### Summary of Interests

I do not have any interests to disclose at this time.

### Additional Questions:

- Are there other relationships or activities that readers could perceive to have influenced, or that give the appearance of potentially influencing, what you wrote in the submitted work?**  
No.
- What is the manuscript title?**  
Immune Imprinting and Protection against Repeat Reinfection with SARS-CoV-2
- Are you the corresponding author?**  
No.

### Certification

I certify that the information provided in this disclosure is complete and accurate.

**Disclosure Purpose:** 22-11055

### Summary of Interests

I do not have any interests to disclose at this time.

### Additional Questions:

- Are there other relationships or activities that readers could perceive to have influenced, or that give the appearance of potentially influencing, what you wrote in the submitted work?**  
No.
- What is the manuscript title?**  
Immune Imprinting and Protection against Repeat Reinfection with SARS-CoV-2
- Are you the corresponding author?**  
No.

### Certification

I certify that the information provided in this disclosure is complete and accurate.

**Disclosure Purpose:** 22-11055

**Summary of Interests**

I do not have any interests to disclose at this time.

**Additional Questions:**

- 1. **Are there other relationships or activities that readers could perceive to have influenced, or that give the appearance of potentially influencing, what you wrote in the submitted work?**  
No.
- 2. **What is the manuscript title?**  
Immune Imprinting and Protection against Repeat Reinfection with SARS-CoV-2
- 3. **Are you the corresponding author?**  
No.

**Certification**

I certify that the information provided in this disclosure is complete and accurate.

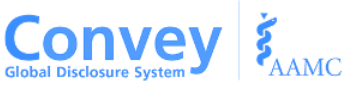

**Disclosure Purpose:** 22-11055

### Summary of Interests

I do not have any interests to disclose at this time.

### Additional Questions:

- Are there other relationships or activities that readers could perceive to have influenced, or that give the appearance of potentially influencing, what you wrote in the submitted work?**  
No.
- What is the manuscript title?**  
Immune Imprinting and Protection against Repeat Reinfection with SARS-CoV-2
- Are you the corresponding author?**  
No.

### Certification

I certify that the information provided in this disclosure is complete and accurate.

**Disclosure Purpose:** 22-11055

### Summary of Interests

I do not have any interests to disclose at this time.

### Additional Questions:

- Are there other relationships or activities that readers could perceive to have influenced, or that give the appearance of potentially influencing, what you wrote in the submitted work?**  
No.
- What is the manuscript title?**  
Immune Imprinting and Protection against Repeat Reinfection with SARS-CoV-2
- Are you the corresponding author?**  
No.

### Certification

I certify that the information provided in this disclosure is complete and accurate.



**Disclosure Purpose:** 22-11055

### Summary of Interests

I do not have any interests to disclose at this time.

### Additional Questions:

- Are there other relationships or activities that readers could perceive to have influenced, or that give the appearance of potentially influencing, what you wrote in the submitted work?**  
No.
- What is the manuscript title?**  
Immune Imprinting and Protection against Repeat Reinfection with SARS-CoV-2
- Are you the corresponding author?**  
No.

### Certification

I certify that the information provided in this disclosure is complete and accurate.

**Disclosure Purpose:** 22-11055

### Summary of Interests

I do not have any interests to disclose at this time.

### Additional Questions:

- Are there other relationships or activities that readers could perceive to have influenced, or that give the appearance of potentially influencing, what you wrote in the submitted work?**  
No.
- What is the manuscript title?**  
Immune Imprinting and Protection against Repeat Reinfection with SARS-CoV-2
- Are you the corresponding author?**  
No.

### Certification

I certify that the information provided in this disclosure is complete and accurate.

**Disclosure Purpose:** 22-11055

Summary of Interests

I do not have any interests to disclose at this time.

Additional Questions:

- 1. **Are there other relationships or activities that readers could perceive to have influenced, or that give the appearance of potentially influencing, what you wrote in the submitted work?**  
No.
- 2. **What is the manuscript title?**  
Immune Imprinting and Protection against Repeat Reinfection with SARS-CoV-2
- 3. **Are you the corresponding author?**  
No.

Certification

I certify that the information provided in this disclosure is complete and accurate.

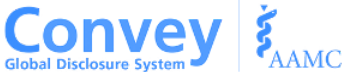

**Disclosure Purpose:** 22-11055

## Summary of Interests

| Company or Organization                                                                         |                  |                                                               |
|-------------------------------------------------------------------------------------------------|------------------|---------------------------------------------------------------|
| Entity                                                                                          | Type             | Interest Held By                                              |
| Gilead Sciences                                                                                 | Grant / Contract | Other - Institution, Veterans Health Foundation of Pittsburgh |
| <i>Recipient Name:</i> Veterans Health Foundation of Pittsburgh                                 |                  | <i>Recipient Type:</i> Institution                            |
| <i>Grant / Contract Description:</i> Investigator initiated grant unrelated to the current work |                  | <i>Grant / Contract Purpose:</i> Research                     |
| <i>Additional Information:</i>                                                                  |                  |                                                               |

## Additional Questions:

- Are there other relationships or activities that readers could perceive to have influenced, or that give the appearance of potentially influencing, what you wrote in the submitted work?**  
No.
- What is the manuscript title?**  
Immune Imprinting and Protection against Repeat Reinfection with SARS-CoV-2
- Are you the corresponding author?**  
No.

## Certification

I certify that the information provided in this disclosure is complete and accurate.

**Disclosure Purpose:** 22-11055

## Summary of Interests

I do not have any interests to disclose at this time.

## Additional Questions:

- Are there other relationships or activities that readers could perceive to have influenced, or that give the appearance of potentially influencing, what you wrote in the submitted work?**  
No.
- What is the manuscript title?**  
Immune Imprinting and Protection against Repeat Reinfection with SARS-CoV-2
- Are you the corresponding author?**  
No.

## Certification

I certify that the information provided in this disclosure is complete and accurate.

**Disclosure Purpose:** 22-11055

### Summary of Interests

I do not have any interests to disclose at this time.

### Additional Questions:

- Are there other relationships or activities that readers could perceive to have influenced, or that give the appearance of potentially influencing, what you wrote in the submitted work?**  
No.
- What is the manuscript title?**  
Immune Imprinting and Protection against Repeat Reinfection with SARS-CoV-2
- Are you the corresponding author?**  
No.

### Certification

I certify that the information provided in this disclosure is complete and accurate.

**Disclosure Purpose:** 22-11055

## Summary of Interests

I do not have any interests to disclose at this time.

## Additional Questions:

- Are there other relationships or activities that readers could perceive to have influenced, or that give the appearance of potentially influencing, what you wrote in the submitted work?**  
No.
- What is the manuscript title?**  
Immune Imprinting and Protection against Repeat Reinfection with SARS-CoV-2
- Are you the corresponding author?**  
No.

## Certification

I certify that the information provided in this disclosure is complete and accurate.

**Disclosure Purpose:** 22-11055

### Summary of Interests

I do not have any interests to disclose at this time.

### Additional Questions:

- Are there other relationships or activities that readers could perceive to have influenced, or that give the appearance of potentially influencing, what you wrote in the submitted work?**  
No.
- What is the manuscript title?**  
Immune Imprinting and Protection against Repeat Reinfection with SARS-CoV-2
- Are you the corresponding author?**  
No.

### Certification

I certify that the information provided in this disclosure is complete and accurate.



**Disclosure Purpose:** 22-11055

**Summary of Interests**

I do not have any interests to disclose at this time.

**Additional Questions:**

- 1. **Are there other relationships or activities that readers could perceive to have influenced, or that give the appearance of potentially influencing, what you wrote in the submitted work?**  
No.
- 2. **What is the manuscript title?**  
Immune Imprinting and Protection against Repeat Reinfection with SARS-CoV-2
- 3. **Are you the corresponding author?**  
No.

**Certification**

I certify that the information provided in this disclosure is complete and accurate.

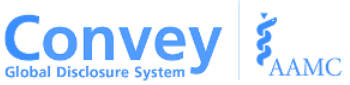

**Disclosure Purpose:** 22-11055

**Summary of Interests**

I do not have any interests to disclose at this time.

**Additional Questions:**

- Are there other relationships or activities that readers could perceive to have influenced, or that give the appearance of potentially influencing, what you wrote in the submitted work?**  
No.
- What is the manuscript title?**  
Immune Imprinting and Protection against Repeat Reinfection with SARS-CoV-2
- Are you the corresponding author?**  
No.

**Certification**

I certify that the information provided in this disclosure is complete and accurate.



**Disclosure Purpose:** 22-11055

### Summary of Interests

I do not have any interests to disclose at this time.

### Additional Questions:

- Are there other relationships or activities that readers could perceive to have influenced, or that give the appearance of potentially influencing, what you wrote in the submitted work?**  
No.
- What is the manuscript title?**  
Immune Imprinting and Protection against Repeat Reinfection with SARS-CoV-2
- Are you the corresponding author?**  
No.

### Certification

I certify that the information provided in this disclosure is complete and accurate.

**Disclosure Purpose:** 22-11055

## Summary of Interests

I do not have any interests to disclose at this time.

## Additional Questions:

- Are there other relationships or activities that readers could perceive to have influenced, or that give the appearance of potentially influencing, what you wrote in the submitted work?**  
No.
- What is the manuscript title?**  
Immune Imprinting and Protection against Repeat Reinfection with SARS-CoV-2
- Are you the corresponding author?**  
No.

## Certification

I certify that the information provided in this disclosure is complete and accurate.

**Disclosure Purpose:** 22-11055

**Summary of Interests**

I do not have any interests to disclose at this time.

**Additional Questions:**

- Are there other relationships or activities that readers could perceive to have influenced, or that give the appearance of potentially influencing, what you wrote in the submitted work?**  
No.
- What is the manuscript title?**  
Immune Imprinting and Protection against Repeat Reinfection with SARS-CoV-2
- Are you the corresponding author?**  
No.

**Certification**

I certify that the information provided in this disclosure is complete and accurate.



**Disclosure Purpose:** 22-11055

Summary of Interests

I do not have any interests to disclose at this time.

Additional Questions:

- 1. **Are there other relationships or activities that readers could perceive to have influenced, or that give the appearance of potentially influencing, what you wrote in the submitted work?**  
No.
- 2. **What is the manuscript title?**  
Immune Imprinting and Protection against Repeat Reinfection with SARS-CoV-2
- 3. **Are you the corresponding author?**  
No.

Certification

I certify that the information provided in this disclosure is complete and accurate.



**Disclosure Purpose:** 22-11055

### Summary of Interests

I do not have any interests to disclose at this time.

### Additional Questions:

- Are there other relationships or activities that readers could perceive to have influenced, or that give the appearance of potentially influencing, what you wrote in the submitted work?**  
No.
- What is the manuscript title?**  
Immune Imprinting and Protection against Repeat Reinfection with SARS-CoV-2
- Are you the corresponding author?**  
No.

### Certification

I certify that the information provided in this disclosure is complete and accurate.
